# Supplementary material for: Identification and Pathogenicity of Fusarium Fungi Associated with Dry Rot of Potato Tubers
Source: MDPI journal article supplement (doi:10.3390/microorganisms12030598), 2024-03-16
Supplement: s1 [file s1]

**Table S1.** *Fusarium* strains whose sequences were used in the phylogenetic study.

| Species                    | Species complex | Strain ID  | Substrate                                 | Origin        | GenBank accessions |             |
|----------------------------|-----------------|------------|-------------------------------------------|---------------|--------------------|-------------|
|                            |                 |            |                                           |               | <i>tef</i>         | <i>rpb2</i> |
| <i>F. nelsonii</i>         | FCSC            | NRRL 13338 |                                           |               | MW233225           | MW233569    |
| <i>F. acaciae-mearnsii</i> | FSAMSC          | NRRL 26755 | Australian acacia                         | South Africa  | MW233086           | MW233429    |
| <i>F. aethiopicum</i>      | FSAMSC          | NRRL 46726 | Wheat seed                                | Ethiopia      | MW233126           | MW233470    |
| <i>F. armeniacum</i>       | FSAMSC          | FRC R-6472 | Slash pine seedling                       | USA           | MW233156           | MW233500    |
| <i>F. armeniacum</i>       | FSAMSC          | FRC R-8519 | Corn soil                                 | USA           | MW233191           | MW233535    |
| <i>F. asiaticum</i>        | FSAMSC          | NRRL 13818 | Barley                                    | Japan         | MW233069           | MW233412    |
| <i>F. austroamericanum</i> | FSAMSC          | NRRL 28585 | Herbaceous vine                           | Brazil        | MW233095           | MW233438    |
| <i>F. boothii</i>          | FSAMSC          | NRRL 26916 | Corn                                      | South Africa  | MW233088           | MW233431    |
| <i>F. brachygibbosum</i>   | FSAMSC          | NRRL 20954 | Sorghum                                   | India         | MW233075           | MW233418    |
| <i>F. brachygibbosum</i>   | FSAMSC          | FRC R-8851 | Pearl millet                              | Niger         | MW233198           | MW233542    |
| <i>F. brasiliicum</i>      | FSAMSC          | NRRL 31238 | Barley                                    | Brazil        | MW233104           | MW233448    |
| <i>F. cerealis</i>         | FSAMSC          | NRRL 13721 | Potato                                    | Poland        | MW233068           | MW233411    |
| <i>F. cortaderiae</i>      | FSAMSC          | NRRL 29297 | Toetoe ( <i>Cortaderia</i> sp.)           | New Zealand   | MW233098           | MW233442    |
| <i>F. culmorum</i>         | FSAMSC          | NRRL 25475 | Barley kernel                             | Denmark       | MW233082           | MW233425    |
| <i>F. dactylidis</i>       | FSAMSC          | NRRL 29380 |                                           | USA           | MW233099           | MW233443    |
| <i>F. gerlachii</i>        | FSAMSC          | NRRL 36905 | Wheat                                     | USA           | MW233118           | MW233462    |
| <i>F. goolgardii</i>       | FSAMSC          | KOD 1087   | Grass tree ( <i>Xanthorrhoea glauca</i> ) | Australia     | MW233218           | MW233562    |
| <i>F. goolgardii</i>       | FSAMSC          | KOD 1090   | Grass tree ( <i>Xanthorrhoea glauca</i> ) | Australia     | MW233219           | MW233563    |
| <i>F. graminearum</i>      | FSAMSC          | NRRL 31084 | Corn                                      | USA           | MW233103           | MW233447    |
| <i>F. kyushuense</i>       | FSAMSC          | NRRL 3509  | Wheat seed                                | Japan         | MW233056           | MW233399    |
| <i>F. kyushuense</i>       | FSAMSC          | NRRL 6491  | Vinyl plate                               | Japan         | MW233057           | MW233400    |
| <i>F. langsethiae</i>      | FSAMSC          | NRRL 34176 |                                           |               | MW233111           | MW233455    |
| <i>F. langsethiae</i>      | FSAMSC          | NRRL 36236 |                                           |               | MW233114           | MW233458    |
| <i>F. longipes-4</i>       | FSAMSC          | NRRL 20695 | Soil                                      | USA           | MW233073           | MW233416    |
| <i>F. longipes-4</i>       | FSAMSC          | NRRL 39691 |                                           |               | MW233123           | MW233467    |
| <i>F. louisianense</i>     | FSAMSC          | NRRL 54197 |                                           | USA           | MW233134           | MW233478    |
| <i>F. lunulosporum</i>     | FSAMSC          | NRRL 13393 | Grapefruit                                | South Africa  | MW233063           | MW233406    |
| <i>F. meridionale</i>      | FSAMSC          | NRRL 28436 | Sweet potato                              | New Caledonia | MW233092           | MW233435    |
| <i>F. mesoamericanum</i>   | FSAMSC          | NRRL 25797 | Banana                                    | Honduras      | MW233083           | MW233426    |
| <i>F. musarum</i>          | FSAMSC          | NRRL 28507 | Banana                                    | Panama        | MW233094           | MW233437    |
| <i>F. nepalense</i>        | FSAMSC          | NRRL 54222 |                                           | Nepal         | MW233135           | MW233479    |

| Species                     | Species complex | Strain ID  | Substrate                                         | Origin           | GenBank accessions |             |
|-----------------------------|-----------------|------------|---------------------------------------------------|------------------|--------------------|-------------|
|                             |                 |            |                                                   |                  | <i>tef</i>         | <i>rpb2</i> |
| <i>F. nodosum</i>           | FSAMSC          | NRRL 13431 | Tomato stem                                       | Turkey           | MW233065           | MW233408    |
| <i>F. nodosum</i>           | FSAMSC          | NRRL 36351 | Stored peanuts                                    | Portugal         | MW233117           | MW233461    |
| <i>F. palustre</i>          | FSAMSC          | NRRL 43289 | Spartina rhizosphere soil                         |                  | MW233124           | MW233468    |
| <i>F. palustre</i>          | FSAMSC          | NRRL 54056 | Smooth cordgrass ( <i>Spartina alterniflora</i> ) | USA              | MW233131           | MW233475    |
| <i>F. pentaseptatum</i>     | FSAMSC          | FRC R-9121 | Soil                                              | China            | MW233213           | MW233557    |
| <i>F. pentaseptatum</i>     | FSAMSC          | NRRL 66939 | Soybean root                                      | Anda, China      | MW233217           | MW233561    |
| <i>F. pentaseptatum</i>     | FSAMSC          | LLC 1022   | endophytic from seed of <i>Striga hermonthica</i> | Ethiopia         | OP487255           | OP486819    |
| <i>F. poae</i>              | FSAMSC          | NRRL 31280 | Oat (var. Linhagem 469)                           | Brazil           | MW233105           | MW233449    |
| <i>F. poae</i>              | FSAMSC          | NRRL 36285 | Barley                                            | Norway           | MW233115           | MW233459    |
| <i>F. praegraminearum</i>   | FSAMSC          | NRRL 39664 | Litter in corn field                              | New Zealand      | MW233121           | MW233465    |
| <i>F. pseudograminearum</i> | FSAMSC          | NRRL 28062 | Barley crown                                      | Australia        | MW233090           | MW233433    |
| <i>F. robustum</i>          | FSAMSC          | NRRL 13392 | Paraná pine ( <i>Araucaria angustifolia</i> )     | Argentina        | MW233062           | MW233405    |
| <i>F. sambucinum</i>        | FSAMSC          | NRRL 13394 |                                                   | Germany          | MW233064           | MW233407    |
| <i>F. sambucinum</i>        | FSAMSC          | NRRL 20663 |                                                   | Germany          | MW233071           | MW233414    |
| <i>F. sambucinum</i>        | FSAMSC          | NRRL 20666 | Potato                                            | United Kingdom   | MW233072           | MW233415    |
| <i>F. sambucinum</i>        | FSAMSC          | NRRL 31964 | Scotch broom ( <i>Cytisus scoparius</i> )         | New Zealand      | MW233106           | MW233450    |
| <i>F. sambucinum</i>        | FSAMSC          | NRRL 31969 | Gorse ( <i>Ulex europaeus</i> )                   | New Zealand      | MW233107           | MW233451    |
| <i>F. sambucinum</i>        | FSAMSC          | FRC R-738  | Potato                                            | USA              | MW233142           | MW233486    |
| <i>F. sambucinum</i>        | FSAMSC          | FRC R-4712 | Potato tuber                                      | Switzerland      | MW233148           | MW233492    |
| <i>F. sibiricum</i>         | FSAMSC          | NRRL 53429 | Oat                                               | Russia           | MW233129           | MW233473    |
| <i>F. sibiricum</i>         | FSAMSC          | NRRL 53430 | Oat                                               | Russia           | MW233130           | MW233474    |
| <i>F. sp. nov.-6</i>        | FSAMSC          | NRRL 28066 | Corn                                              | Japan            | MW233091           | MW233434    |
| <i>F. sp. nov.-6</i>        | FSAMSC          | NRRL 54640 | Sweet potato stem                                 | Papua New Guinea | MW233136           | MW233480    |
| <i>F. sp. nov.-6</i>        | FSAMSC          | NRRL 54683 | Sweet potato stem                                 | Papua New Guinea | MW233137           | MW233481    |
| <i>F. sp. nov.-7</i>        | FSAMSC          | NRRL 46743 | Wheat seed                                        | Ethiopia         | MW233127           | MW233471    |
| <i>F. sp. nov.-7</i>        | FSAMSC          | NRRL 66736 |                                                   | Ethiopia         | MW233139           | MW233483    |
| <i>F. sp. nov.-8</i>        | FSAMSC          | NRRL 29296 | Chayote ( <i>Sechium edule</i> )                  | New Zealand      | MW233097           | MW233441    |
| <i>F. sp. nov.-9</i>        | FSAMSC          | NRRL 13465 | Tiger pear ( <i>Opuntia aurantica</i> )           | Argentina        | MW233067           | MW233410    |
| <i>F. sp. nov.-9</i>        | FSAMSC          | NRRL 66925 | Tiger pear ( <i>Opuntia aurantica</i> )           | Argentina        | MW233162           | MW233506    |
| <i>F. sp. nov.-10</i>       | FSAMSC          | NRRL 22189 | Soybean                                           | Brazil           | MW233076           | MW233419    |
| <i>F. sp. nov.-10</i>       | FSAMSC          | FRC R-7403 | Potato                                            | South Africa     | MW233166           | MW233510    |

| Species                     | Species complex | Strain ID    | Substrate                                 | Origin         | GenBank accessions |             |
|-----------------------------|-----------------|--------------|-------------------------------------------|----------------|--------------------|-------------|
|                             |                 |              |                                           |                | <i>tef</i>         | <i>rpb2</i> |
| <i>F. sp. nov.-11</i>       | FSAMSC          | NRRL 22192   | Palm tree                                 | Indonesia      | MW233077           | MW233420    |
| <i>F. sp. nov.-12</i>       | FSAMSC          | FRC R-642    | Carnation 'Iroquois'                      |                | MW233141           | MW233485    |
| <i>F. sp. nov.-12</i>       | FSAMSC          | FRC R-7107   | Soil                                      | South Africa   | MW233163           | MW233507    |
| <i>F. sp. nov.-12</i>       | FSAMSC          | FRC R-7122   | Soil                                      | South Africa   | MW233164           | MW233508    |
| <i>F. sp. nov.-12</i>       | FSAMSC          | FRC R-8227   | Debris                                    | South Africa   | MW233188           | MW233532    |
| <i>F. sp. nov.-12</i>       | FSAMSC          | NRRL 66929   | Debris                                    | South Africa   | MW233189           | MW233533    |
| <i>F. sp. nov.-13</i>       | FSAMSC          | NRRL 39635   | Toetoe ( <i>Cortaderia</i> sp.)           | New Zealand    | MW233120           | MW233464    |
| <i>F. sp. nov.-13</i>       | FSAMSC          | NRRL 39685   | Toetoe ( <i>Cortaderia</i> sp.)           | New Zealand    | MW233122           | MW233466    |
| <i>F. sp. nov.-14</i>       | FSAMSC          | NRRL 36134   |                                           |                | MW233113           | MW233457    |
| <i>F. sp. nov.-15</i>       | FSAMSC          | NRRL 66921   | Wheat straw                               | South Africa   | MW233146           | MW233490    |
| <i>F. sp. nov.-15</i>       | FSAMSC          | FRC R-8154   | Soil                                      | South Africa   | MW233185           | MW233529    |
| <i>F. sp. nov.-15</i>       | FSAMSC          | FRC R-8203   | Debris                                    | South Africa   | MW233187           | MW233531    |
| <i>F. sp. nov.-16</i>       | FSAMSC          | NRRL 66927   | Natural vegetation soil                   | South Africa   | MW233178           | MW233522    |
| <i>F. sp. nov.-16</i>       | FSAMSC          | FRC R-8136   | Debris                                    | South Africa   | MW233184           | MW233528    |
| <i>F. sp. nov.-17</i>       | FSAMSC          | NRRL 26795   | Soil                                      | USA            | MW233087           | MW233430    |
| <i>F. sp. nov.-27</i>       | FSAMSC          | FRC R-8881   |                                           | Nigeria        | MW233201           | MW233545    |
| <i>F. sporotrichioides</i>  | FSAMSC          | NRRL 3299    | Corn                                      | France         | MW233055           | MW233398    |
| <i>F. sporotrichioides</i>  | FSAMSC          | NRRL 29131   | Oat kernel                                | Germany        | MW233096           | MW233440    |
| <i>F. subflagellisporum</i> | FSAMSC          | COAD 2989    | Branches of <i>Mangifera indica</i> trees | Brazil         | MT774486           | MZ970426    |
| <i>F. subtropicale</i>      | FSAMSC          | NRRL 66764   | Barley                                    | Paraná, Brazil | MW233140           | MW233484    |
| <i>F. transvaalense</i>     | FSAMSC          | FRC R-6827   | Natural vegetation debris                 | South Africa   | MW233157           | MW233501    |
| <i>F. transvaalense</i>     | FSAMSC          | FRC R-6855   | Natural vegetation debris                 | South Africa   | MW233158           | MW233502    |
| <i>F. ussurianum</i>        | FSAMSC          | NRRL 45681   | Oat                                       | Russia         | MW233125           | MW233469    |
| <i>F. venenatum</i>         | FSAMSC          | NRRL 22196   | Corn                                      | Germany        | MW233078           | MW233421    |
| <i>F. venenatum</i>         | FSAMSC          | NRRL 25413   |                                           | England        | MW233080           | MW233423    |
| <i>F. venenatum</i>         | FSAMSC          | NRRL 26228   | Halmbase of winter wheat                  | Austria        | MW233085           | MW233428    |
| <i>F. venenatum</i>         | FSAMSC          | NRRL 32015   | Soil                                      | Australia      | MW233109           | MW233453    |
| <i>F. vorosii</i>           | FSAMSC          | NRRL 37605   |                                           | Hungary        | MW233119           | MW233463    |
| <i>F. acutisporum</i>       | FSSC            | NRRL 22574 T | <i>Coffea arabica</i>                     | Guatemala      | LR583593           | LR583814    |
| <i>F. addoense</i>          | FSSC            | CBS 146510 T | <i>Citrus sinensis</i> , crown            | South Africa   | MW248741           | MW446575    |
| <i>F. addoense</i>          | FSSC            | CBS 146508   | <i>Citrus sinensis</i> , crown            | South Africa   | MW248739           | MW446573    |
| <i>F. akasia</i>            | FSSC            | PPRI 27978 T | <i>Eurwallacea perbrevis</i> specimen     | Indonesia      | MT009951           | MT009931    |

| Species                  | Species complex | Strain ID       | Substrate                                                                                                                    | Origin        | GenBank accessions |             |
|--------------------------|-----------------|-----------------|------------------------------------------------------------------------------------------------------------------------------|---------------|--------------------|-------------|
|                          |                 |                 |                                                                                                                              |               | <i>tef</i>         | <i>rpb2</i> |
| <i>F. akasia</i>         | FSSC            | PPRI 27980      | <i>Euwallacea perbrevis</i> specimen                                                                                         | Indonesia     | MT009954           | MT009937    |
| <i>F. ambrosium</i>      | FSSC            | NRRL 22346 T    | Gallery of <i>Euwallacea fornicatus</i> in <i>Camellia sinensis</i>                                                          | India         | FJ240350           | EU329503    |
| <i>F. ambrosium</i>      | FSSC            | NRRL 20438      | <i>Euwallacea fornicatus</i> insect body in the gallery formed in tea tree ( <i>Camellia sinensis</i> )                      | India         | AF178332           | JX171584    |
| <i>F. amplum</i>         | FSSC            | BBA 4170 T      | <i>Coffea</i> sp.                                                                                                            | East Africa   | LR583594           | LR583815    |
| <i>F. awan</i>           | FSSC            | PPRI 27973T     | <i>Euwallacea similis</i> specimen                                                                                           | Indonesia     | MT009973           | MT009919    |
| <i>F. awan</i>           | FSSC            | PPRI 27975      | <i>Euwallacea similis</i> specimen                                                                                           | Indonesia     | MT009974           | MT009922    |
| <i>F. bataticola</i>     | FSSC            | NRRL 22400      | <i>Ipomoea batatas</i>                                                                                                       | USA           | AF178343           | EU329509    |
| <i>F. bataticola</i>     | FSSC            | NRRL 22402 T    | <i>Ipomoea batatas</i>                                                                                                       | USA           | AF178344           | FJ240381    |
| <i>F. borneense</i>      | FSSC            | NRRL 22579 T    | Bark of a recently dead unidentified tree                                                                                    | Indonesia     | AF178352           | EU329515    |
| <i>F. bostrycoides</i>   | FSSC            | NRRL 36253 T    | Soil                                                                                                                         | Honduras      | LR583597           | LR583818    |
| <i>F. bostrycoides</i>   | FSSC            | CBS 102824      | Leaf litter                                                                                                                  | Colombia      | LR583596           | LR583817    |
| <i>F. breve</i>          | FSSC            | MUCL 16108 T    | Soilwater                                                                                                                    | Belgium       | LR583601           | LR583822    |
| <i>F. breve</i>          | FSSC            | CPC 27190       | <i>Citrus sinensis</i> , dry root rot                                                                                        | Italy         | LT746199           | LT746312    |
| <i>F. breviconum</i>     | FSSC            | NRRL 22659T     | <i>Gladiolus</i> sp.                                                                                                         | Indonesia     | LR583600           | LR583821    |
| <i>F. catenatum</i>      | FSSC            | UTHSC 09-1008   | Zebra shark ( <i>Stegostoma fasciatum</i> )                                                                                  | USA           | KC808213           | KC808354    |
| <i>F. catenatum</i>      | FSSC            | UTHSC 09-1009 T | Zebra shark ( <i>Stegostoma fasciatum</i> )                                                                                  | USA           | KC808214           | KC808355    |
| <i>F. crassum</i>        | FSSC            | MUCL 11420 T    |                                                                                                                              | France        | LR583604           | LR583823    |
| <i>F. crassum</i>        | FSSC            | NRRL 46703      | Nematode egg                                                                                                                 | Spain         | HM347126           | EU329661    |
| <i>F. cryptoseptatum</i> | FSSC            | NRRL 22412 T    | Bark                                                                                                                         | French Guiana | AF178351           | EU329510    |
| <i>F. cucurbiticola</i>  | FSSC            | NRRL 22399 T    | <i>Cucurbita ficifolia</i>                                                                                                   | Netherlands   | DQ247592           | LR583825    |
| <i>F. cucurbiticola</i>  | FSSC            | NRRL 22153      | Cucurbit                                                                                                                     | USA           | AF178346           | EU329492    |
| <i>F. cyanescens</i>     | FSSC            | CBS 518.82 T    | Human foot                                                                                                                   | Netherlands   | LR583605           | LR583826    |
| <i>F. cyanescens</i>     | FSSC            | CBS 637.82      | Human foot                                                                                                                   | Netherlands   | LR583606           | LR583827    |
| <i>F. diminutum</i>      | FSSC            | MUCL 18798 T    | treated wood of <i>Coelocaryon preussii</i>                                                                                  |               | LR583607           | LR583828    |
| <i>F. diminutum</i>      | FSSC            | LC 13825        | Acer palmatum                                                                                                                | Japan         | MW620164           | MW474689    |
| <i>F. drepaniforme</i>   | FSSC            | NRRL 62941      | Unknown woody host                                                                                                           | Singapore     | KM406626           | KM406647    |
| <i>F. duplospermum</i>   | FSSC            | NRRL 62583 T    | Oral mycangium of an ambrosia beetle ( <i>Euwallacea perbrevis</i> ) trapped in an avocado ( <i>Persea americana</i> ) grove | USA           | KC691553           | KC691642    |

| Species                       | Species complex | Strain ID       | Substrate                                                                                                                          | Origin        | GenBank accessions |             |
|-------------------------------|-----------------|-----------------|------------------------------------------------------------------------------------------------------------------------------------|---------------|--------------------|-------------|
|                               |                 |                 |                                                                                                                                    |               | <i>tef</i>         | <i>rpb2</i> |
| <i>F. duplospermum</i>        | FSSC            | NRRL 62589      | Oral mycangium of an ambrosia beetle ( <i>Euwallacea perbrevis</i> ) trapped in an avocado ( <i>Persea americana</i> ) grove       | USA           | KC691552           | KC691641    |
| <i>F. epipeda</i>             | FSSC            | CPC 38310 T     | <i>Bouvardia</i> sp. imported from Uganda                                                                                          | Netherlands   | MW834285           | MW834022    |
| <i>F. epipeda</i>             | FSSC            | CPC 38311       | <i>Bouvardia</i> sp. imported from Uganda                                                                                          | Netherlands   | MW834286           | MW834023    |
| <i>F. euwallaceae</i>         | FSSC            | NRRL 54722T     | Live ambrosia beetle ( <i>Euwallacea</i> sp. IS/CA) infecting avocado tree ( <i>Persea americana</i> cv. Hass) grown in an orchard | Israel        | JQ038007           | JQ038028    |
| <i>F. euwallaceae</i>         | FSSC            | NRRL 62626      | <i>Euwallacea</i> sp. on <i>Acer negundo</i>                                                                                       | USA           | KC691532           | KU171702    |
| <i>F. falciforme</i>          | FSSC            | IMI 268681 T    | Human mycetoma                                                                                                                     | USA           | LT906669           | LT960558    |
| <i>F. falciforme</i>          | FSSC            | CBS 121450      | Declined grape vine                                                                                                                | Syria         | JX435161           | JX435261    |
| <i>F. falciforme</i>          | FSSC            | LC 11569        | <i>Vitis</i> sp.                                                                                                                   | China         | MW620165           | MW474690    |
| <i>F. ferrugineum</i>         | FSSC            | NRRL 32437 T    | Human subcutaneous nodule                                                                                                          | Switzerland   | DQ246979           | EU329581    |
| <i>F. ferrugineum</i>         | FSSC            | CPC 28194       | <i>Citrus sinensis</i>                                                                                                             | Italy         | LR583602           | LT746341    |
| <i>F. floridanum</i>          | FSSC            | NRRL 62628 T    | Mycangium of <i>Euwallacea interjectus</i> infesting <i>Acer negundo</i>                                                           | USA           | KC691535           | KC691624    |
| <i>F. floridanum</i>          | FSSC            | NRRL 62606      | Gallery of <i>Euwallacea interjectus</i> infesting <i>Acer negundo</i>                                                             | USA           | KC691533           | KC691622    |
| <i>F. gamtoosensis</i>        | FSSC            | CPC 37120 T     | <i>Citrus sinensis</i> , crown                                                                                                     | South Africa  | MW248762           | MW446611    |
| <i>F. gannanense</i>          | FSSC            | NJFU-JX12 T     | Oral mycetangium of a <i>Euwallacea interjectus</i> beetle infesting a trunk of a live <i>Triadica cochinchinensis</i>             | China         | LC701609           | LC701981    |
| <i>F. gannanense</i>          | FSSC            | NJFU-JX01       | <i>Euwallacea interjectus</i> beetle infesting in trunks of dying <i>Alniphyllum fortunei</i>                                      | China         | LC701625           | LC701973    |
| <i>F. haematococcum</i>       | FSSC            | G.J.S. 02-90 T  | Dying tree                                                                                                                         | Sri Lanka     | DQ247510           | LT960561    |
| <i>F. helgardnirenbergiae</i> | FSSC            | NRRL 22387 T    | Bark of unidentified tree                                                                                                          | French Guiana | AF178339           | EU329505    |
| <i>F. hypothenemi</i>         | FSSC            | NRRL 52782 T    | <i>Hypothenemus hampei</i> , adult                                                                                                 | Benin         | JF740850           | JF741176    |
| <i>F. hypothenemi</i>         | FSSC            | NRRL 52783      | <i>Hypothenemus hampei</i> , adult                                                                                                 | Uganda        | JF740851           | JF741177    |
| <i>F. illudens</i>            | FSSC            | NRRL 22090 T    | Beilschmiedia tawa                                                                                                                 | New Zealand   | AF178326           | JX171601    |
| <i>F. kelerajum</i>           | FSSC            | FRC S-1836      | On branch of recently dead unidentified tree                                                                                       | Sri Lanka     | DQ247515           | LR583835    |
| <i>F. kelerajum</i>           | FSSC            | G.J.S. 02-122 T | Trunk of fallen, live tree                                                                                                         | Sri Lanka     | DQ247518           |             |

| Species                      | Species complex | Strain ID    | Substrate                                                                                         | Origin        | GenBank accessions |             |
|------------------------------|-----------------|--------------|---------------------------------------------------------------------------------------------------|---------------|--------------------|-------------|
|                              |                 |              |                                                                                                   |               | <i>tef</i>         | <i>rpb2</i> |
| <i>F. keratoplasticum</i>    | FSSC            | FRC S-2477 T | Indoor plumbing                                                                                   | USA           | JN235712           | JN235897    |
| <i>F. keratoplasticum</i>    | FSSC            | MUCL 18301   | Greenhouse humic soil                                                                             | Belgium       | LR583613           | LR583836    |
| <i>F. kuroshium</i>          | FSSC            | UCR3641 T    | Gallery wall produced by <i>Euwallaceae</i> sp. in <i>Platanus racemosa</i> (California sycamore) | USA           | KX262216           | LR583837    |
| <i>F. kuroshium</i>          | FSSC            | NRRL 62946   | <i>Euwallacea</i> sp. on <i>Platanus racemosa</i>                                                 |               | KM406630           | KM406650    |
| <i>F. kurunegalense</i>      | FSSC            | CBS 119599 T | Recently cut non-native tree standing in private garden                                           | Sri Lanka     | DQ247511           | LR583838    |
| <i>F. lerouxii</i>           | FSSC            | CBS 146514 T | <i>Citrus sinensis</i> , root scaffold                                                            | South Africa  | MW248768           | MW446617    |
| <i>F. lichenicola</i>        | FSSC            | CBS 623.92 T | Human foot                                                                                        | Germany       | LR583620           | LR583845    |
| <i>F. liriodendri</i>        | FSSC            | NRRL 22389 T | <i>Liriodendron tulipifera</i>                                                                    | USA           | AF178340           | EU329506    |
| <i>F. macrosporum</i>        | FSSC            | CPC 28191 T  | <i>Citrus sinensis</i> , crown                                                                    | Italy         | LT746218           | LT746331    |
| <i>F. macrosporum</i>        | FSSC            | CPC 28193    | <i>Citrus sinensis</i> , crown                                                                    | Italy         | LT746220           | LT746333    |
| <i>F. mahasenii</i>          | FSSC            | FRC S-1845 T | Small dead branch on living tree                                                                  | Sri Lanka     | DQ247513           | LT960563    |
| <i>F. mahasenii</i>          | FSSC            | FRC S-1840   | Rotting wood                                                                                      | Sri Lanka     | DQ247520           |             |
| <i>F. martii</i>             | FSSC            | CBS 115659   | <i>Solanum tuberosum</i> var. Maritta                                                             | Germany       | JX435156           | JX435256    |
| <i>F. martii</i>             | FSSC            | CBS 142423   | <i>Citrus sinensis</i> , crown                                                                    | Italy         | LT746216           | LT746329    |
| <i>F. mekan</i>              | FSSC            | PPRI 27971 T | <i>Euwallacea similis</i> specimen                                                                | Indonesia     | MT009964           | MT009916    |
| <i>F. mekan</i>              | FSSC            | PPRI 27972   | <i>Euwallacea similis</i> specimen                                                                | Indonesia     | MT009965           | MT009917    |
| <i>F. merksianum</i>         | FSSC            | CPC 38701 T  | <i>Chrysanthemum</i> sp. imported from Uganda                                                     | Netherlands   | MW834288           | MW834025    |
| <i>F. merksianum</i>         | FSSC            | CPC 38702    | <i>Chrysanthemum</i> sp.                                                                          | Netherlands   | MW834289           | MW834026    |
| <i>F. metavorans</i>         | FSSC            | CBS 135789 T | Human pleural effusion, lung cancer                                                               | Greece        | LR583627           | LR583849    |
| <i>F. metavorans</i>         | FSSC            | NRRL 22654   | <i>Malus sylvestris</i>                                                                           | Italy         | DQ247636           | LR583848    |
| <i>F. mori</i>               | FSSC            | NRRL 22230 T | <i>Morus alba</i> , twig                                                                          | Japan         | AF178358           | EU329499    |
| <i>F. neerlandicum</i>       | FSSC            | CBS 232.34 T | <i>Pisum sativum</i>                                                                              | Netherlands   | MW847906           | MW847903    |
| <i>F. neocosmosporiellum</i> | FSSC            | NRRL 22166 T | <i>Heterodera glycines</i>                                                                        | USA           | AF178350           | EU329497    |
| <i>F. neocosmosporiellum</i> | FSSC            | NRRL 22468   | <i>Arachis hypogaea</i> , stored nut                                                              | Guinea-Bissau | KM231933           | LR583901    |
| <i>F. ngaiotongaense</i>     | FSSC            | CBS 126407 T | Tree bark                                                                                         | New Zealand   | LR583621           | LR583846    |
| <i>F. ngaiotongaense</i>     | FSSC            | LC 13833     | <i>Armeniaca mume</i>                                                                             | Japan         | MW620175           | MW474700    |
| <i>F. noneumartii</i>        | FSSC            | FRC S-0661 T | <i>Solanum tuberosum</i>                                                                          | Israel        | LR583630           | LR583852    |
| <i>F. noneumartii</i>        | FSSC            | Fs112        | <i>Solanum lycopersicum</i>                                                                       | USA           | DQ164848           |             |

| Species                   | Species complex | Strain ID    | Substrate                                                                                                                                           | Origin       | GenBank accessions |             |
|---------------------------|-----------------|--------------|-----------------------------------------------------------------------------------------------------------------------------------------------------|--------------|--------------------|-------------|
|                           |                 |              |                                                                                                                                                     |              | <i>tef</i>         | <i>rpb2</i> |
| <i>F. noneumartii</i>     | FSSC            | Fs306        | <i>Solanum lycopersicum</i>                                                                                                                         | USA          | DQ164847           |             |
| <i>F. obliquiseptatum</i> | FSSC            | NRRL 62611 T | Gallery of an ambrosia beetle ( <i>Euwallacea</i> sp. 3) infesting an avocado tree ( <i>Persea americana</i> )                                      | Australia    | KC691548           | KC691637    |
| <i>F. obliquiseptatum</i> | FSSC            | NRRL 62610   | <i>Euwallacea</i> sp. on <i>Persea americana</i>                                                                                                    | Australia    | KC691547           | KC691636    |
| <i>F. oblongum</i>        | FSSC            | NRRL 28008 T | Human eye                                                                                                                                           | USA          | LR583631           | LR583853    |
| <i>F. oblongum</i>        | FSSC            | LC 7499      | Carbonatite                                                                                                                                         | China        | MW620179           | MW474704    |
| <i>F. oligoseptatum</i>   | FSSC            | NRRL 62579 T | Live female <i>Euwallacea validus</i> beetle, extracted from a gallery in a <i>Ailanthus altissima</i> tree                                         | USA          | KC691538           | LR583854    |
| <i>F. oligoseptatum</i>   | FSSC            | NRRL 62578   | <i>Euwallacea validus</i> on <i>Ailanthus altissima</i>                                                                                             | USA          | KC691537           | KC691626    |
| <i>F. papillatum</i>      | FSSC            | NRRL 62944   | Mycangium of a living female TSHB beetle ( <i>Euwallacea perbrevis</i> ) from a gallery in a branch of an infested tea ( <i>Camellia sinensis</i> ) | Sri Lanka    | KM406627           | KM406648    |
| <i>F. papillatum</i>      | FSSC            | NRRL 62943 T | Mycangium of a living female TSHB beetle ( <i>Euwallacea perbrevis</i> ) from a gallery in a branch of an infested tea ( <i>Camellia sinensis</i> ) | Sri Lanka    | KM406628           |             |
| <i>F. paraeumartii</i>    | FSSC            | NRRL 13997 T | <i>Solanum tuberosum</i> , decaying stem base                                                                                                       | Argentina    | DQ247549           | LR583855    |
| <i>F. paraeumartii</i>    | FSSC            | LC13836      | <i>Castanopsis fargesii</i>                                                                                                                         | China        | MW620181           | MW474706    |
| <i>F. parceramosum</i>    | FSSC            | CBS 115695 T | Soil                                                                                                                                                | South Africa | JX435149           | JX435249    |
| <i>F. parceramosum</i>    | FSSC            | NRRL 31158   | Human wound                                                                                                                                         | USA          | DQ246916           | EU329559    |
| <i>F. paulenelsonii</i>   | FSSC            | CBS 309.75 T | <i>Pisum sativum</i>                                                                                                                                |              | MW847907           | MW847904    |
| <i>F. perseae</i>         | FSSC            | CPC 26829 T  | <i>Persea americana</i> , trunk canker lesions                                                                                                      | Italy        | LT991902           | LT991909    |
| <i>F. perseae</i>         | FSSC            | CPC 26831    | <i>Persea americana</i> , trunk canker lesions                                                                                                      | Italy        | LT991904           | LT991911    |
| <i>F. petroliphilum</i>   | FSSC            | NRRL 13952   | <i>Pelargonium</i> sp. root                                                                                                                         | South Africa | DQ246835           | LR583857    |
| <i>F. petroliphilum</i>   | FSSC            | CBS 398.66   | <i>Saccharum officinarum</i>                                                                                                                        | Brazil       | LR583633           | LR583859    |
| <i>F. phaseoli</i>        | FSSC            | CBS 265.50   | <i>Phaseolus</i> sp.                                                                                                                                | USA          | HE647964           | KM232375    |
| <i>F. phaseoli</i>        | FSSC            | NRRL 22743   | <i>Glycine max</i>                                                                                                                                  | Brazil       | AY320145           | EU329525    |
| <i>F. piperis</i>         | FSSC            | NRRL 22570 T | <i>Piper nigrum</i>                                                                                                                                 | Brazil       | AF178360           | EU329513    |
| <i>F. plagianthi</i>      | FSSC            | NRRL 22632   | <i>Hoheria glabrata</i>                                                                                                                             | New Zealand  | AF178354           | JX171614    |

| Species                     | Species complex | Strain ID       | Substrate                                                                                       | Origin           | GenBank accessions |             |
|-----------------------------|-----------------|-----------------|-------------------------------------------------------------------------------------------------|------------------|--------------------|-------------|
|                             |                 |                 |                                                                                                 |                  | <i>tef</i>         | <i>rpb2</i> |
| <i>F. populicola</i>        | FSSC            | NJFU-DF02 T     | Oral mycetangium of <i>Euwallacea interjectus</i> beetle infesting the trunk of a living poplar | China            | LC701596           | LC701960    |
| <i>F. populicola</i>        | FSSC            | NJFU-JS03       | Oral mycetangium of <i>Euwallacea interjectus</i> beetle infesting the trunk of a living poplar | China            | LC701602           | LC701966    |
| <i>F. protoensiforme</i>    | FSSC            | NRRL 22178 T    | Dicot tree, bark                                                                                | Venezuela        | AF178334           | EU329498    |
| <i>F. pseudensiforme</i>    | FSSC            | NRRL 46517 T    | Recently dead tree, bark                                                                        | Sri Lanka        | DQ247512           | KC691645    |
| <i>F. pseudensiforme</i>    | FSSC            | NRRL 22653      | <i>Cocos nucifera</i> , leaf                                                                    | Indonesia        | DQ247635           | LR583868    |
| <i>F. pseudopisi</i>        | FSSC            | CBS 266.50 T    | <i>Pisum sativum</i>                                                                            |                  | MW834290           | MW834027    |
| <i>F. pseudoradicicola</i>  | FSSC            | NRRL 25137 T    | Diseased cocoa pods                                                                             | Papua New Guinea | JF740757           | JF741084    |
| <i>F. pseudotonkinense</i>  | FSSC            | CBS 143038 T    | Human, scrape of cornea                                                                         | Netherlands      | LR583640           | LR583867    |
| <i>F. quercinum</i>         | FSSC            | NRRL 22652 T    | Quercus cerris wood, declined tree                                                              | Italy            | DQ247634           | LR583869    |
| <i>F. quercinum</i>         | FSSC            | NRRL 22611      | Human cornea                                                                                    | USA              | DQ246841           | EU329518    |
| <i>F. rectiphorus</i>       | FSSC            | G.J.S. 9296 T   | Recently dead tree                                                                              | Sri Lanka        | DQ247509           | LR583871    |
| <i>F. rectiphorus</i>       | FSSC            | NRRL 22396      | Bark                                                                                            | French Guiana    | AF178342           | EU329508    |
| <i>F. regulare</i>          | FSSC            | CBS 230.34 T    | <i>Pisum sativum</i>                                                                            | Netherlands      | LR583643           | LR583873    |
| <i>F. regulare</i>          | FSSC            | CBS 190.35      | <i>Phaseolus</i> sp.                                                                            | USA              | LR583642           | LR583872    |
| <i>F. rekanum</i>           | FSSC            | PPRI 27163 T    | <i>Acacia crassicarpa</i> infested with <i>Euwallacea perbrevis</i> (TSHBa) beetle              | Indonesia        | MN249151           | MN249137    |
| <i>F. rekanum</i>           | FSSC            | CMW 51760       | <i>Acacia crassicarpa</i> infested with <i>Euwallacea perbrevis</i>                             | Indonesia        | MN249160           | MN249146    |
| <i>F. riograndense</i>      | FSSC            | URM 7361 T      | Human nasal cavity                                                                              | Brazil           | KX534002           | KX534003    |
| <i>F. samuelsii</i>         | FSSC            | CBS 114067 T    | Bark                                                                                            | Guyana           | LR583644           | LR583874    |
| <i>F. silvicola</i>         | FSSC            | CBS 123846 T    | <i>Liriodendron tulipifera</i> , fallen trunk                                                   | USA              | LR583646           | LR583876    |
| <i>F. solani</i>            | FSSC            | NRRL 66304 T    | Tuber of <i>Solanum tuberosum</i> (potato) collected from field following harvest               | Slovenia         | KT313611           | KT313623    |
| <i>F. solani</i>            | FSSC            | CBS 101018      | Raspberry                                                                                       | Italy            | LR583651           | LR583878    |
| <i>F. solani</i>            | FSSC            | LC 13849        | Soil                                                                                            | China            | MW620196           | MW474721    |
| <i>F. solani-melongenae</i> | FSSC            | CBS 225.58      | Unsterilized dewaxed cotton duck                                                                | Panama           | LR583609           | LR583830    |
| <i>F. solani-melongenae</i> | FSSC            | NRRL 22657      | <i>Capsicum annuum</i>                                                                          | Netherlands      | DQ247639           | LR583831    |
| <i>F. spathulatum</i>       | FSSC            | UTHSC 98-1305 T | Human synovial fluid                                                                            | USA              | DQ246882           | EU329542    |



| Species                         | Species complex | Strain ID       | Substrate                                                                                         | Origin    | GenBank accessions |             |
|---------------------------------|-----------------|-----------------|---------------------------------------------------------------------------------------------------|-----------|--------------------|-------------|
|                                 |                 |                 |                                                                                                   |           | <i>tef</i>         | <i>rpb2</i> |
| <i>F. stercicola</i>            | FSSC            | CBS 142480      |                                                                                                   |           | KY556525           | KY556553    |
| <i>F. stercicola</i>            | FSSC            | KU 90.15 –      |                                                                                                   |           | MG237868           | MG237866    |
| <i>F. stercicola</i>            | FSSC            | KU 90.1.15 –    |                                                                                                   |           | MG237869           | MG237867    |
| <i>F. stercicola</i>            | FSSC            | CBS 142481 T    | Compost yard waste plant debris                                                                   | Germany   | LR583658           | LR583887    |
| <i>F. suttonianum</i>           | FSSC            | NRRL 32858 T    | Human wound                                                                                       | USA       | DQ247163           | EU329630    |
| <i>F. suttonianum</i>           | FSSC            | CBS 124892      | Human nail                                                                                        | Gabon     | JX435139           | JX435239    |
| <i>F. tonkinense</i>            | FSSC            | IMI 113868 T    | <i>Musa sapientum</i>                                                                             | Vietnam   | LT906672           | LT960564    |
| <i>F. tonkinense</i>            | FSSC            | CBS 118931      | <i>Solanum lycopersicum</i>                                                                       | UK        | LR583662           | LR583891    |
| <i>F. tuaranense</i>            | FSSC            | NRRL 22231 T    | Pará rubber tree ( <i>Hevea brasiliensis</i> )<br>damaged by an unknown ambrosia beetle           | Malaysia  | KC691542           | KC691631    |
| <i>F. tuaranense</i>            | FSSC            | NRRL 46518      | <i>Hevea brasiliensis</i>                                                                         | Malaysia  | KC691543           | KC691632    |
| <i>F. tumidispermum</i>         | FSSC            | NJFU-JX26 T     | <i>Euwallacea interjectus</i> beetle infesting the trunk of a living <i>Elaeocarpus decipiens</i> | China     | LC701621           | LC701993    |
| <i>F. vanettenii</i>            | FSSC            | NRRL 45880 T    | Progeny from the sexual cross of parents from <i>Pisum sativum</i> and soil from a potato field   | USA       | LR583636           | LR583862    |
| <i>F. vanettenii</i>            | FSSC            | CBS 127118      | Soil                                                                                              | USA       | LR583637           | LR583863    |
| <i>F. variasi</i>               | FSSC            | PPRI 27958 T    | <i>Acacia crassicarpa</i> infested with <i>Euwallacea perbrevis</i> (TSHBa)                       | Indonesia | MT009967           | MT009913    |
| <i>F. variasi</i>               | FSSC            | PPRI 27968      | <i>Acacia crassicarpa</i> infested with <i>Euwallacea perbrevis</i> (TSHBa)                       | Indonesia | MT009969           | MT009915    |
| <i>F. venezuelense</i>          | FSSC            | NRRL 22395 T    | Bark                                                                                              | Venezuela | AF178341           | EU329507    |
| <i>F. waltergamsii</i>          | FSSC            | NRRL 32323 T    | Human bronchoalveolar lavage fluid                                                                | USA       | DQ246951           | EU329576    |
| <i>F. waltergamsii</i>          | FSSC            | NRRL 22655      | Three-plywood                                                                                     | Nigeria   | DQ247637           | LT960559    |
| <i>F. warna</i>                 | FSSC            | PPRI 27974 T    | <i>Euwallacea perbrevis</i> (TSHBa) specimen                                                      | Indonesia | MT009955           | MT009920    |
| <i>F. warna</i>                 | FSSC            | PPRI 27977      | <i>Euwallacea perbrevis</i> (TSHBa) specimen                                                      | Indonesia | MT009958           | MT009925    |
| <i>F. yamamotoi</i>             | FSSC            | NRRL 22277 T    | <i>Zanthoxylum piperitum</i> , trunk                                                              | Japan     | AF178336           | FJ240380    |
| <i>Neocosmospora anhuiensis</i> | FSSC            | CGMCC 3.24869 T | rotten twigs                                                                                      | China     | OQ866530           | OQ866525    |
| <i>N. aquatica</i>              | FSSC            | CGMCC 3.24275 T | submerged decaying wood in a stream                                                               | China     | OQ064518           |             |
| <i>N. aquatica</i>              | FSSC            | CGMCC 3.24276   | submerged decaying wood in a stream                                                               | China     | OQ064520           |             |
| <i>N. aurantia</i>              | FSSC            | CGMCC 3.24866 T | rotten bark                                                                                       | China     | OQ866528           | OQ866523    |

| Species                      | Species complex | Strain ID        | Substrate                                                          | Origin        | GenBank accessions |             |
|------------------------------|-----------------|------------------|--------------------------------------------------------------------|---------------|--------------------|-------------|
|                              |                 |                  |                                                                    |               | <i>tef</i>         | <i>rpb2</i> |
| <i>N. caricae</i>            | FSSC            | CBS 148865 T     | Trunk of <i>Ficus carica</i> cv. Sabz                              | Iran          | OK539518           | OK415859    |
| <i>N. caricae</i>            | FSSC            | CBS 148932       | Trunk of <i>Ficus carica</i> cv. Sabz                              | Iran          | OK539516           | OK415857    |
| <i>N. dimorpha</i>           | FSSC            | CGMCC 3.24867 T  | rotten twigs                                                       | China         | OQ866529           | OQ866524    |
| <i>N. galbana</i>            | FSSC            | CGMCC 3.24868 T  | rotten bark                                                        | China         | OQ866532           | OQ866527    |
| <i>N. geoasparagicola</i>    | FSSC            | CPC 40592 T      | Field soil cultured with <i>Asparagus officinalis</i>              | Netherlands   | ON745622           | ON759301    |
| <i>N. geoasparagicola</i>    | FSSC            | CPC 40628        | Field soil cultured with <i>Asparagus officinalis</i>              |               | ON745627           | ON759306    |
| <i>N. lechatii</i>           | FSSC            | CPC 42648 T      | Unidentified dead wood                                             | French Guiana | OP481884           | OP481882    |
| <i>N. lechatii</i>           | FSSC            | CPC 42649        | Unidentified dead wood                                             | French Guiana | OP481885           | OP481883    |
| <i>N. lithocarpi</i>         | FSSC            | LC 1113 T        | <i>Lithocarpus glaber</i> (also called <i>Lithocarpus glabra</i> ) | China         | MW620172           | MW474697    |
| <i>N. lithocarpi</i>         | FSSC            | LC 13831         | <i>Lithocarpus glabra</i>                                          | China         | MW620173           | MW474698    |
| <i>N. magnoliae</i>          | FSSC            | MFLUCC 17-2615 T | dried fruits of <i>Magnolia champaca</i>                           | Thailand      | MT212207           | MT212200    |
| <i>N. maoershanica</i>       | FSSC            | CGMCC 3.24870 T  | twigs                                                              | China         | OQ866531           | OQ866526    |
| <i>Geejayessia atrofusca</i> |                 | CBS 125482       | <i>Staphylea trifolia</i> , twigs                                  | Canada        | MW834282           | HQ897775    |
